# Supplementary material
Source: PubMed Central journal article supplement (PMC2887569)
Supplement: supp_90_9_2191__1.pdf [file supp_90_9_2191__1.pdf]

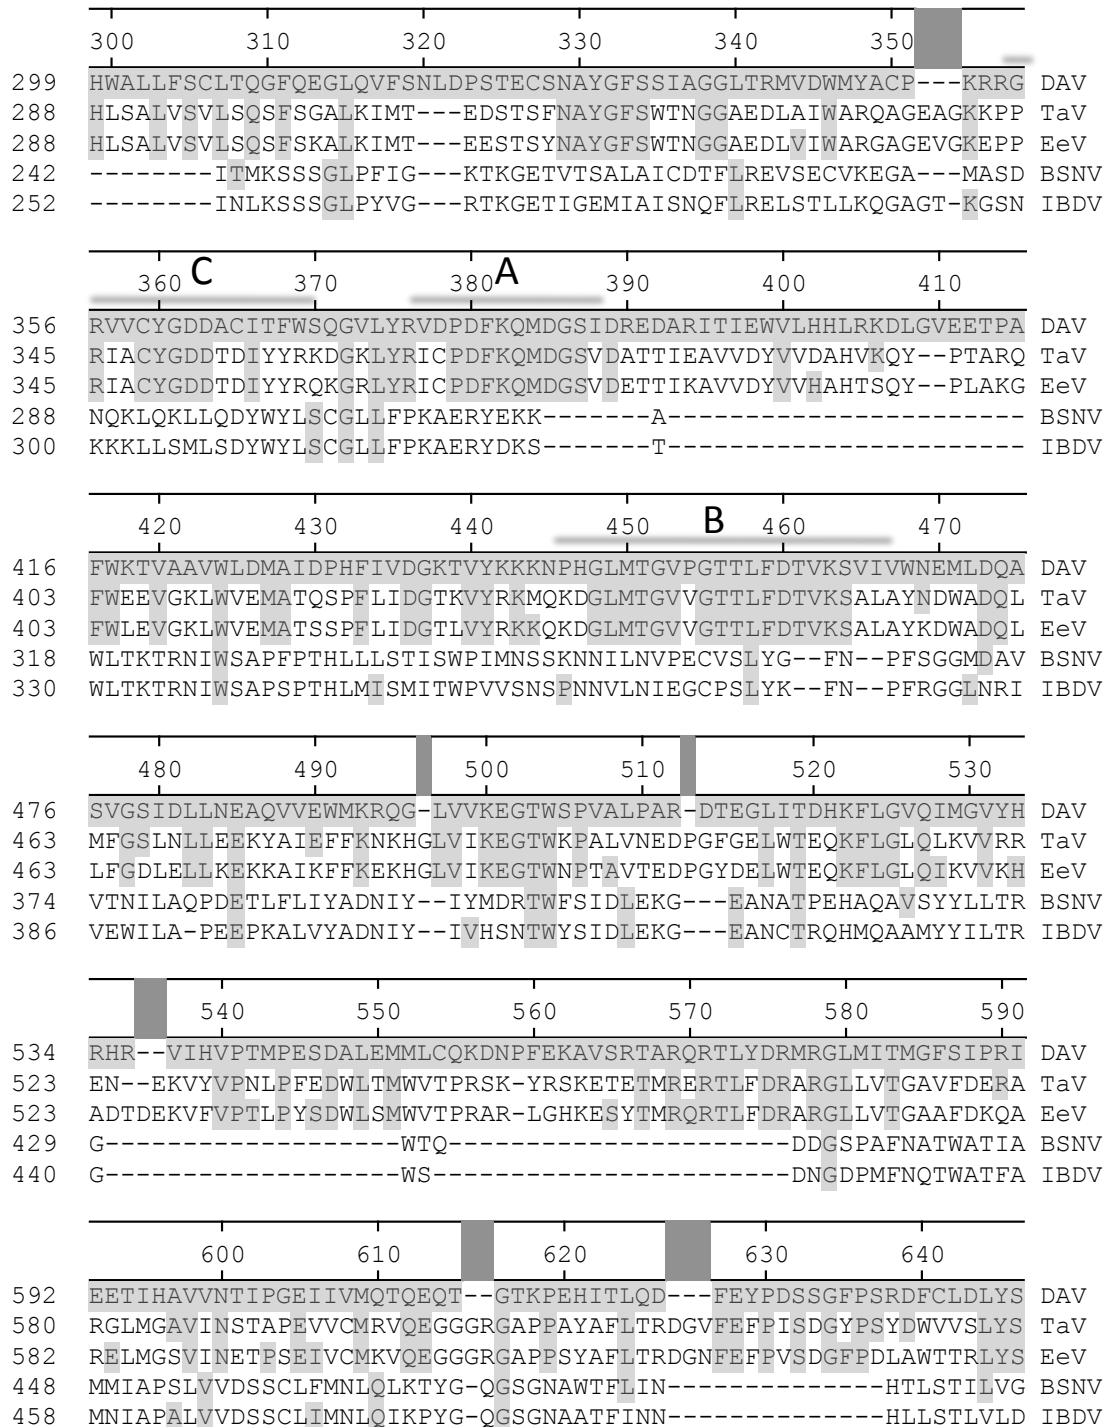

**Supplementary Fig. S1.** Alignment of RdRP showing C–A–B arrangement of RdRP motifs. Virus RdRP regions as shown for *Drosophila A virus* (DAV), *Thosea asigna virus* (TaV), *Euprosterina elaeasa virus* (EeV), *blotched snakehead virus* (BSNV) and *infectious bursal disease virus* (IBDV). The regions identified as the C, A and B motifs are indicated. Amino acids matching the DAV sequence are boxed in grey and dashes represent gaps introduced to improve alignment. Alignment was performed using standard parameters for CLUSTAL W in the DNASTAR software package.

**Ambrose, R. L., Lander, G. C., Maaty, W. S., Bothner, B., Johnson, J. E. & Johnson, K. N. (2009).** *Drosophila A virus* is an unusual RNA virus with a  $T=3$  icosahedral core and permuted RNA-dependent RNA polymerase. *J Gen Virol* **90**, 2191–2200.

```

1      10      20      30      40      50      60      70      80      90      100     110     120
DaV  MATIVTTTKRISNNSNGNFSRNRRTPKVTVQSVSSRQIVGKNCMPVQGPRRRRGRNRPRKSGSQVAYSAMPKTTLSGVDIIGVIEVQPQRAVGASLFAQAICPTAMSDSRLQQQSKLYSR
RYMV  .....TNSNQGGQGGKRRSRRRPRGRSAEPQLQRA----PVAQASRISGTVGPLSSNT-----WPLHSVEFLADFKRS---STSADATFYDCVFPNLP--RVWSLARCYSM
CoMV  .....DWFDTGMITYLGGFQRTAGTTD...SQVFIVSPAALD..RVGTIAKAYAL
CarMV .....AVKLVTRGWASLSTNQKRRRAEMLAGYTPAILAFTPRRPRMTNPPPTSRNSPGQAGKSM.....TMSKTELLS..TVKGTGTGVIPIPSFEDVWVSPRNVA.PQLSLLATNFNK
TBSV  .....GLGKKALNKVNRNRKQGNQOIIITHVGGVGGSI--MAPVAVSRLVGS-KPKFTGR---TSGGVTVTSHREYLTQVGFVNVGGIVGNLS-QLNPSNGTLFSWLPALASNFDO
SBMV  .....AQAIQNTLPNPPRRKRRRAQAQVPKPTQAGVSMAPIAQGTVMVCLR.PPMLR.....SMDVTTLSHCELSDELAV...TVTTIVVTSELVMPPTVG.TWLRGVAQNWSK
TNV   EANGIFVEQRWNGKRWVTEASWRAGQAPNKERAATVTKSIARKVRGGVSRAGGFVTAPVIGAMVTRPTVPRFGMRGNSTVVSNSSELILNLTPIALAYTVQSLPLIAT.AWLGTIADNYSK

130     140     150     160     170     180     190     200     210     220     230     240
DaV  WRPKKRLVLLVVGSGSANFSGSLAIGWSPDPANNISGNDTQNLNRVMACRPPSSMNRMQTTVLNIPVATTRKWLTKGNPDDANHGFINVVVASTTGGYTGSTTFTVTLWEVIEFEGAEELG
RYMV  WKPTRWDVVVYLPVVSATVAGSIEMCFLYDYADTIPRYTGMKSRGAEGCHLLSGGSARNAVVASMDCSRVGGWKRVTSSIPSSVDPNVNLAVRSLIKPTVSDTPGKLYVIASML.....
CoMV  WRPKHWEIVYLPKRCSTQTDGSIEMGFLLDYADSVPTNTRTMASDGSLLHTSMKSMGNAVTSALPDEFNSKWFKLSWSTPEESENPARFVVRSDFPVVTADQPGHLWLRSLRLLPSTNL..
CarMV YRITALTVKYSPACSFETNGRVALGFNDASDTPPTTKVG...FYDLGKHVETAQAQAKDLVIPVDGKTRFIRDSASDDAKLVDFGRIVLSTYGFDKADTVVGELEFIQYTIIV.....
TBSV  YSFNSVVLVYVPLCGTTEVGRVALYFDKDSQDPEPADRVE----LANFGVLKETAPWAEAMLRIPTDKV-KRYCNDSATVDQKLDLGLGLGIATYGGAGADAVGELFLARSVTLTYFPQPT
SBMV  YAWVAIRYTYLPSCTTTSGAIHMGFQYDMADTLFVSVNQLSNLKGIVTGPVWEGQSLCFVNNTKCPDTSRAITIALDTNEVSEKRYPLVTAMEGGSSKTAVNTRLYASYTIRLIEPIAA
TNV   WRWVSLRIIYSPKCPPTTSGTVAMCLSYDRNDVAPGSRVQLSQTYKAINFPYAGYDGAAILNLDVTPPTSAIYVDVDVTRFDKAWY.TVHIGSDGGPAVAVPPGDIFFKYVIELEIPIINP

250     260     270     280     290     300     310     320     330     340     350     360     370     380
DAV  AVSIDEDITPDTGFQDLFTTSDGWSNSEYLTMKMHGGQMVFFSAAHQAYVYTNAPGTVNYTYLEDKTTLKTNANFFAVIQGYSIPGFVFMFASYTDAKDYIRTGDTGKCLKYTTQGPVISPPPIPKFRVADEAVQTVETNL
RYMV  .....
CoMV  .....
CarMV .....LSDPTKTAKISQASNDKVS DGPTYVVPVNGNELQLRVAAGK...WCIIVRGTVEGGFTKPTLIGPGISGDVDYES.....
TBSV  NTLSSKRLDLTG.....SLADATGPGYLVLRTPPTVLTHTRATGTFNLSGGLRCLTSLT.....
SBMV  ALNL.....
TNV   TMNV.....

```

**Supplementary Fig. S2.** Alignment of deduced capsid protein sequence of DAV with those of other RNA viruses; rice yellow mottle virus (RYMV), cocksfoot mottle virus (CoMV), carnation mottle virus (CarMV), tomato bushy stunt virus (TBSV), southern bean mosaic virus (SBMV) and tobacco necrosis virus (TNV). The alignment is based on structural motifs that are conserved between the viruses. The sequence of the DAV capsid is shown in the top line. For all other sequences, amino acids shown in red represent  $\alpha$ -helices, blue represent  $\beta$ -strands and black represents an insertion. Each grey dash represents a gap inserted into the sequence for better alignment, and dots represents residues that are ignored in the alignment due to low similarity.
